# Supplementary material for: Forward lunge before and after anterior cruciate ligament reconstruction: Faster movement but unchanged knee joint biomechanics
Source: PLoS One. 2020 Jan 24;15(1):e0228071. doi: 10.1371/journal.pone.0228071 (PMC6980669; doi:10.1371/journal.pone.0228071)
Supplement: S1 Dataset — (XLSX) [file pone.0228071.s001.xlsx]

## Sheet: Demographics
ID	Age_pre	Weight_pre	Heigth_pre	BMI_pre	Time from injury to pre-surgery test (months)	ID	Age_post	Weight_post	Height_post	BMI_post	Time from surgery to post-surgery test (months)	CONTROLS	Age	weight	Height	BMI
1	23	86.8	1.82	26.2046	*	1	23	87.7	1.82	26.4763	*	1	26	81.8	1.82	24.6951
2	30	95.3	1.722	32.1386	24	2	30	101.8	1.73	34.0138	7.5	2	36	89.9	1.87	25.7085
3	27	81.1	1.83	24.2169	12	3	27	83.5	1.835	24.7979	7.5	3	18	67.2	1.84	19.8488
4	24	74.6	1.845	21.9152	3	4	25	76.9	1.842	22.6645	12	4	24	64.3	1.79	20.068
5	28	81.7	1.815	24.801	10	5	29	82.3	1.822	24.7915	10	5	26	96.7	1.83	28.8752
6	24	72.6	1.8	22.4074	12.5	6	25	71.7	1.8	22.1296	10.5	6	19	72	1.71	24.623
7	55	83.8	1.81	25.5792	60	7	56	86.3	1.81	26.3423	12	7	40	98.7	1.93	26.4974
8	30	73.5	1.743	24.1932	36	8	31	73.9	1.73	24.6918	12	8	33	79.9	1.83	23.8586
9	29	75.4	1.81	23.0152	8	9	30	77.1	1.8	23.7963	11	9	28	77.8	1.8	24.0123
10	24	91.4	1.77	29.1742	1	10	25	91.4	1.76	29.5067	10	10	23	72.5	1.74	23.9464
11	39	94.3	1.78	29.7627	5	11	40	93.5	1.78	29.5102	14.5	11	28	95.1	1.75	31.0531
12	23	80.3	1.865	23.0865	101	12	24	83.7	1.87	23.9355	10	12	23	65.4	1.75	21.3551
13	41	76.4	1.895	21.2753	4	13	42	79.8	1.895	22.2221	11.5	13	37	82.9	1.82	25.0272
14	24	76.3	1.79	23.8132	4	14	25	80.4	1.79	25.0928	11	14	25	78.7	1.81	24.0225
15	28	70.4	1.77	22.4712	4	15	29	72.5	1.77	23.1415	11	15	27	80.1	1.84	23.659
16	31	78.5	1.845	23.0609	12	16	32	79.3	1.848	23.2204	11	16	35	75.4	1.78	23.7975
17	29	77.9	1.793	24.2313	36	17	30	72.5	1.803	22.3021	11	17	26	87	1.88	24.6152
18	20	60.8	1.67	21.8007	11	18	20	59.5	1.665	21.4629	7	18	17	58.4	1.76	18.8533
19	22	62.5	1.605	24.2622	7	19	23	61.9	1.6	24.1797	8	19	23	74.5	1.74	24.6069
20	54	63	1.63	23.7118	120	20	55	65.5	1.63	24.6528	*	20	40	76.9	1.62	29.3019
21	35	62.2	1.635	23.2678	8	21	36	61.3	1.645	22.6532	12	21	41	59.2	1.68	20.9751
22	23	80.3	1.77	25.6312	4	22	24	71.8	1.785	22.5345	12	22	23	70	1.77	22.3435
23	31	66.4	1.61	25.6163	30	23	32	67	1.615	25.688	11	23	25	65.5	1.64	24.3531
24	20	47.9	1.615	18.365	7	24	21	48.3	1.615	18.5183	11	24	18	51.2	1.63	19.2706
25	18	75.2	1.772	23.9492	1	25	19	76.5	1.78	24.1447	13	25	24	65.9	1.75	21.5184
26	26	61.9	1.65	22.7365	4	26	27	60.9	1.65	22.3691	11	26	26	62.7	1.77	20.0134
27	24	66.1	1.705	22.738	6	27	25	69.5	1.71	23.768	9	27	22	67.3	1.79	21.0043
28	25	70.2	1.68	24.8724	2.5	28	26	72.4	1.685	25.4999	11	28	24	81	1.74	26.7539

## Sheet: Lunge_Time
ID	ACLd pre	ACLr post	Control
1	3.78733	2.88167	1.566
2	2.48133	2.228	2.29767
3	2.13967	1.60133	1.68433
4	1.62467	1.64633	1.58833
5	1.847	1.55533	1.477
6	1.337	1.33667	3.088
7	3.333	1.826	2.879
8	1.90867	1.409	1.34033
9	2.21833	1.42467	1.45233
10	2.46	1.26	3.29
11	4.15	3.71	1.86
12	2.46	1.97	1.76
13	2.486	1.76733	1.42967
14	2.35	1.78	3.07
15	4.20067	2.624	1.28033
16	1.43467	1.21133	1.43433
17	2.56533	2.78833	1.32333
18	1.73533	1.41767	1.33933
19	2.12433	1.98733	1.45767
20	1.89267	1.76767	1.865
21	1.461	1.116	1.11033
22	2.47733	1.55	1.62167
23	1.78933	1.48067	1.274
24	1.599	1.362	2.39433
25	1.98333	1.469	2.13767
26	2.22	1.33	2.33
27	1.49933	1.47267	1.435
28	1.55167	1.714	1.815

## Sheet: GRF
ID	FZ ACLd	FZ ACLr	FZ Control	FY1 ACLd	FY1 ACLr	FY1 Control	FY2 ACLd	FY2 ACLr	FY2 Control
1	9.09058	11.2696	8.6057	-2.45746	-2.86663	-2.47023	-2.79316	-4.72443	-2.48742
2	8.82047	11.629	9.74431	-2.64929	-2.64321	-2.84462	-2.88042	-4.36035	-4.12371
3	8.20528	9.35407	9.20338	-2.77122	-2.71604	-3.29151	-3.03712	-3.34753	-4.23113
4	9.47493	9.50279	8.58411	-2.89128	-2.77043	-3.09216	-4.39264	-3.76102	-2.95239
5	8.37737	10.2237	9.39843	-2.88099	-2.84173	-2.27872	-3.97785	-4.10853	-3.49185
6	9.78664	8.849	7.52429	-2.50211	-2.55954	-1.71199	-3.68541	-3.94868	-2.21042
7	7.95443	10.0633	8.13513	-2.19307	-1.9498	-2.32486	-1.64334	-3.1654	-2.81281
8	9.42155	10.2251	9.38987	-2.03904	-1.92058	-2.16296	-3.10276	-3.74528	-3.51731
9	8.24609	9.60874	9.76007	-2.4602	-2.84268	-2.58532	-2.77426	-3.03079	-3.77824
10	8.89986	9.65508	7.97647	-2.72176	-2.7526	-2.00987	-4.20599	-4.26881	-2.87314
11	9.79548	9.58914	10.0456	-3.6718	-3.15754	-2.2017	-4.03929	-3.52508	-4.17833
12	8.99185	9.17426	6.52394	-2.78342	-2.04279	-1.91521	-2.13238	-1.91568	-2.52271
13	7.81474	9.2454	12.3034	-1.79805	-2.80116	-3.38143	-1.84234	-2.86524	-4.91706
14	7.49845	8.8	8.662	-2.65232	-2.28	-2.46478	-2.49236	-2.64	-3.42748
15	8.08588	7.49139	8.94805	-3.76505	-2.93793	-2.71316	-2.56992	-2.15014	-2.96199
16	9.08927	10.752	9.63662	-2.23997	-2.48259	-2.39436	-4.18632	-4.66516	-3.48373
17	8.40429	9.80343	11.9939	-1.72815	-2.46369	-2.95753	-2.43376	-3.37828	-5.38752
18	9.05838	7.47885	7.94889	-3.15001	-2.53244	-2.82484	-3.67301	-3.10426	-1.95848
19	8.02821	7.21951	11.0907	-1.85669	-1.49573	-2.45576	-3.2459	-2.39029	-3.44008
20	8.48576	6.77689	9.41046	-2.65709	-2.44313	-2.00912	-2.31735	-2.39219	-4.07531
21	9.17587	7.71709	7.67094	-2.28147	-2.15644	-1.6229	-3.25696	-2.58942	-2.36967
22	8.49801	8.52356	9.88315	-2.82693	-3.46334	-2.25959	-3.36236	-2.99088	-4.20213
23	8.34128	7.53855	8.23727	-2.07628	-2.27168	-2.82428	-2.29063	-2.89437	-3.14789
24	9.18129	5.95492	7.5586	-3.26889	-1.67019	-1.97715	-3.63364	-2.50677	-2.5665
25	7.94842	8.67949	10.9897	-2.63258	-2.63744	-4.65809	-3.27843	-3.47429	-5.56509
26	7.86568	8.73619	8.10994	-1.81934	-2.0312	-2.00191	-1.96128	-2.31773	-3.07867
27	8.20214	7.90028	9.46103	-2.02968	-2.09173	-3.56176	-3.41114	-3.30256	-4.21289
28	8.02986	8.88765	12.6118	-2.56621	-2.26206	-2.94242	-2.85765	-3.52959	-4.2801

## Sheet: Knee_Joint_Moment
ID	peak mom ACLd	peak mom ACLr	peak mom CON	1-25% mom ACLd	1-25% mom ACLr	1-25% mom CON	75-100% mom ACLd	75-100% mom ACLr	75-100% mom CON
1	0.427875	0.57943	1.02539	0.0453859	0.259487	0.520779	-0.117759	0.272849	0.137348
2	0.813311	0.885893	0.535458	-0.0690163	-0.0771082	0.313166	0.480542	0.337824	0.249958
3	0.549481	0.770563	0.867716	0.336605	0.446961	0.618898	0.0154233	0.355585	0.682354
4	0.948499	0.731278	0.808725	0.602339	0.351334	0.532389	0.7109	0.545884	0.29961
5	0.947346	0.902403	1.04051	0.525413	0.547944	0.409601	0.509943	0.449747	0.312929
6	0.723216	0.441786	0.84513	0.342343	0.195379	0.443228	0.529219	0.260596	-0.165561
7	1.02755	0.681243	1.09515	0.330306	0.210504	0.192552	0.5486	0.342779	0.846712
8	0.929013	1.09253	1.09986	0.42041	0.153562	0.557049	0.452097	0.495862	0.592814
9	0.628253	0.429982	0.671233	0.384173	0.24949	0.304761	-0.00504622	0.0416071	0.545766
10	0.806409	0.636405	0.581945	0.17544	0.320449	-0.0464758	0.538371	0.42494	-0.158711
11	0.120067	0.373217	0.484077	-0.165998	-0.311591	0.21654	-0.14833	-0.160094	0.120119
12	0.953929	0.604414	0.473022	0.343642	0.156265	0.228888	0.236617	0.1877	0.314651
13	0.828382	0.797623	1.08601	0.363669	0.315979	0.827064	0.282834	0.386311	0.667213
14	0.560243	*	0.704134	0.395227	*	0.384765	0.28771	*	0.320771
15	0.581999	0.443536	0.672825	0.263012	0.162558	0.388836	-0.0300912	-0.156231	0.456079
16	0.611176	0.738171	0.933682	0.10795	0.255876	0.428697	0.421212	0.555811	0.790389
17	0.723713	0.526018	0.799376	0.018455	0.292665	0.306068	0.2194	0.264658	0.475555
18	0.780231	0.52838	0.769234	0.439344	0.304309	0.429791	0.633346	0.386252	0.26026
19	0.276173	0.565006	0.795165	-0.0214221	0.0512009	0.34027	0.189249	0.328307	0.356936
20	0.714352	0.671358	0.731047	0.242292	0.171204	0.46246	0.407081	0.0849521	0.513074
21	0.845053	0.592573	1.06273	0.34163	0.269576	0.565711	0.691961	0.181598	0.694615
22	0.213748	0.363444	0.896014	-0.0177267	0.0673017	0.519092	-0.0221467	-0.218858	0.529477
23	0.458526	0.526125	0.926038	-0.0581892	0.365537	0.486516	-0.117893	0.191756	0.154015
24	0.664019	0.576541	0.864508	0.461101	0.31303	0.472142	0.255616	0.152314	0.572275
25	0.686217	0.565595	0.551182	0.475457	0.239623	0.177726	0.512552	0.417963	0.302453
26	*	0.476664	0.494932	*	0.248786	0.297328	*	0.208315	0.0125856
27	0.651318	0.491842	1.06419	0.293092	0.224537	0.721525	0.448384	0.213731	0.789635
28	0.807778	0.696923	1.01903	0.536939	0.301772	0.504866	0.332978	0.181128	0.870606

## Sheet: Knee_Joint_Ang_Vel
ID	Angvel_flex ACLd	Angvel_flex ACLr	Angvel_flex CON	Angvel_ext ACLd	Angvel_ext ACLr	Angvel_ext CON
1	-208.918	-206.972	-416.907	276.306	344.649	303.726
2	-205.75	-205.79	-437.35	352.554	315.754	580.952
3	-294.266	-234.024	-524.662	325.678	265.832	438.738
4	-254.063	-325.536	-453.505	361.041	354.108	351.364
5	-284.168	-300.145	-460.599	424.71	407.153	459.502
6	-274.379	-320.674	-248.694	380.526	415.237	241.161
7	-222.031	-241.834	-359.108	205.073	279.058	239.43
8	-236.926	-269.243	-405.648	333.017	392.015	523.421
9	-362.861	-233.562	-449.954	250.686	233.161	391.804
10	-335.066	-388.352	-165.712	490.026	448.999	184.177
11	-301.725	-286.17	-324.373	282.346	247.798	349.792
12	-228.392	-287.248	-325.406	220.959	252.513	301.071
13	-292.802	-322.988	-498.406	190.426	273.962	596.654
14	-266.209	*	-253.873	243.018	*	344.514
15	-397.602	-433.355	-625.638	209.749	210.067	355.047
16	-317.551	-327.505	-426.137	431.968	390.011	396.827
17	-276.151	-431.783	-355.45	369.603	257.993	621.785
18	-319.507	-302.382	-782.806	466.312	412.916	511.749
19	-283.182	-254.614	-435.044	422.561	373.34	247.767
20	-257.178	-255.348	-301.104	248.471	358.876	431.224
21	-316.343	-357.194	-364.598	432.623	497.284	402.576
22	-451.473	-451.004	-317.099	281.69	475.8	316.098
23	-254.848	-296.599	-424.207	324.549	290.484	511.156
24	-673.99	-684.115	-511.268	407.826	579.586	406.442
25	-416.941	-437.356	-510.855	306.744	429.965	426.464
26	*	-344.518	-269.068	*	428.167	404.443
27	-411.611	-373.72	-532.713	427.789	388.482	579.853
28	-349.17	-407.952	-571.672	248.296	347.109	436.619

## Sheet: Knee_Joint_Power
ID	neg power ACLd	neg power ACLr	neg power CON	pos power ACLd	pos power ACLr	pos power CON
1	-1.95586	-3.73018	-2.49771	1.72197	1.10169	1.38954
2	-0.904323	-2.76787	-7.19301	2.82431	2.01472	1.00696
3	-1.35355	-1.89125	-3.9657	2.46869	1.17872	3.85349
4	-2.68557	-1.68968	-1.9424	5.51896	3.20536	1.27566
5	-2.40182	-2.34857	-2.09015	2.95552	2.79655	1.56026
6	-1.71792	-1.99853	-1.83808	2.96571	1.64659	0.81276
7	-0.636943	-0.730955	-0.85788	1.26315	2.1249	2.05466
8	-1.52263	-2.34377	-2.93452	1.87977	2.48573	3.17884
9	-1.62339	-1.22149	-1.57247	0.750521	0.460407	3.17311
10	-0.909356	-3.00175	-0.809456	2.88467	5.48355	0.594321
11	-0.200156	-0.266174	-0.799889	0.362303	0.432248	2.15739
12	-1.07073	-0.693418	-1.28318	0.925253	0.717007	1.8108
13	-1.17616	-1.40738	-5.74936	1.20075	2.30758	4.76974
14	-1.70022	0	-1.10313	0.744341	0	0.744828
15	-1.78353	-1.03443	-2.66731	0.382411	0.346792	3.59941
16	-2.59336	-1.38686	-2.36064	2.3856	3.70996	4.8488
17	-2.53325	-1.11149	-4.93319	1.09892	0.591961	3.65515
18	-1.67821	-1.41663	-4.18833	2.64652	2.05424	6.75998
19	-2.23735	-2.14595	-1.57885	1.45376	1.29113	1.59621
20	-0.785685	-0.757187	-1.33658	1.64251	0.77723	2.31279
21	-1.74377	-2.04436	-2.76282	4.54745	1.5653	3.84188
22	-1.8176	-1.56481	-2.36188	0.618546	0.117977	1.94725
23	-1.49301	-1.55769	-2.42563	0.951314	1.06237	1.38448
24	-4.0791	-3.03007	-3.80101	3.4471	2.2745	4.22766
25	-2.07102	-1.25965	-1.67364	2.46133	2.05027	1.91628
26	0	-1.68138	-0.699085	0	1.29032	0.336716
27	-2.21583	-2.51892	-6.08699	2.29707	1.1091	4.73405
28	-2.01117	-1.25792	-1.92368	1.65405	1.75702	5.08544

## Sheet: PROMS
ID	Tegner pre	Tegner post		Lysholm pre	Lysholm post		IKDC pre	IKDC post		ID	KNEES-ACL ADL pre	KNEES-ACL Psychosocial pre	KNEES-ACL symptoms pre	KNEES-ACL slackness pre	KNEES-ACL looseness pre	KNEES-ACL sports behav pre	KNEES-ACL sports phys pre		KNEES-ACL ADL post	KNEES-ACL Psychosoc post	KNEES-ACL symptoms post	KNEES-ACL slackness post	KNEES-ACL looseness post	KNEES-ACL sports behav post	KNEES-ACL sports phys post		KOOS symptoms pre	KOOS pain pre	KOOS ADL pre	KOOS sports and rec pre	KOOS QOL pre	KOOS symptoms post	KOOS pain post	KOOS ADL post	KOOS sports and rec post	KOOS QUL post
1	5	6		68	85		71.2766	81.9149		1	9	6	5	12	7	16	5		3	1	2	5	2	8	1		80	58.3333	86.7647	55	37.5	89.2857	91.6667	100	90	75
2	5	4		78	85		81.9149	82.9787		2	2	5	5	4	3	10	3		1	4	2	4	0	6	2		82.1429	88.8889	97.0588	85	62.5	82.1429	94.4444	100	85	68.75
3	4	4		80	*		75.5319	75.5319		3	2	6	4	9	6	14	4		5	2	2	8	5	14	6		89.2857	83.3333	82.3529	65	18.75	82.1429	80.5556	85.2941	65	56.25
4	*	5		*	68		72.3404	70.2128		4	9	2	6	7	4	14	8		8	4	10	12	7	13	10		82.1429	83.3333	88.2353	60	43.75	75	75	80.8824	60	37.5
5	5	5		76	85		76.5957	85.1064		5	5	3	1	3	2	9	1		0	6	2	2	3	12	1		100	97.2222	100	95	50	96.4286	97.2222	100	95	50
6	4	5		72	74		78.7234	74.4681		6	2	1	3	4	3	9	0		5	2	4	1	2	6	7		89.2857	88.8889	95.5882	75	50	82.1429	88.8889	89.7059	60	62.5
7	4	5		*	99		62.766	89.3617		7	11	10	5	11	11	7	0		3	0	0	1	0	0	1		67.8571	83.3333	86.7647	20	12.5	100	97.2222	98.5294	85	75
8	*	5		*	90		*	86.1702		8	*	*	*	*	*	*	*		3	1	0	9	7	9	1		*	*	*	*	*	82.1429	94.4444	98.5294	75	68.75
9	5	4		68	74		67.0213	63.8298		9	13	9	6	8	5	17	0		12	6	7	6	3	17	8		89.2857	83.3333	94.1176	35	50	64.2857	72.2222	73.5294	10	31.25
10	10	10		89	91		81.9	96.8		10	1	1	2	2	1	13	0		0	1	2	0	0	0	0		100	91.6667	97.0588	90	43.75	89.2857	94.4444	100	100	81.25
11	4	7		81	79		76.6	78.7		11	5	1	3	10	4	12	8		5	1	4	6	3	11	6		85.7143	83.3333	88.2353	75	37.5	75	69.4444	86.7647	75	50
12	6	5		65	80		80.9	79.8		12	5	0	2	10	4	8	2		4	1	10	4	4	8	6		89.2857	94.4444	95.5882	75	56.25	71.4286	80.5556	91.1765	50	56.25
13	3	5		60	85		64.8936	81.9149		13	9	5	3	2	1	14	0		5	4	1	1	0	8	1		82.1429	75	95.5882	50	43.75	89.2857	94.4444	97.0588	75	56.25
14	2	5		61	100		67.0213	87.234		14	13	9	10	11	4	11	8		0	3	0	2	0	5	0		67.8571	77.7778	95.5882	55	43.75	85.7143	100	82.3529	100	68.75
15	4	6		84	86		64.8936	85.1064		15	4	5	0	7	3	7	0		3	0	3	3	2	7	1		92.8571	97.2222	95.5882	95	43.75	78.5714	83.3333	92.6471	75	56.25
16	3	5		81	73		65.9574	82.9787		16	7	10	5	6	0	18	12		4	5	7	6	5	16	3		82.1429	80.5556	86.7647	20	37.5	64.2857	88.8889	92.6471	75	56.25
17	2	3		44	45		39.3617	48.9362		17	14	14	16	7	6	12	7		13	14	14	10	8	12	6		60.7143	27.7778	48.5294	10	18.75	50	52.7778	52.9412	25	12.5
18	5	5		64	94		67.0213	79.7872		18	12	12	13	14	7	18	7		3	9	3	14	5	13	8		75	72.2222	86.7647	40	25	92.8571	88.8889	94.1176	60	50
19	7	7		75	86		70.2128	86.1702		19	11	8	6	7	3	18	7		5	0	2	1	0	12	5		82.1429	83.3333	89.7059	35	43.75	89.2857	91.6667	95.5882	70	68.75
20	4	6		91	99		86.1702	89.3617		20	0	0	1	7	4	5	1		2	0	1	2	1	2	0		100	97.2222	97.0588	85	37.5	85.7143	97.2222	98.5294	85	62.5
21	4	5		83	90		67.0213	85.1064		21	11	7	9	11	8	18	0		4	0	4	5	0	2	0		57.1429	69.4444	85.2941	50	43.75	78.5714	86.1111	95.5882	75	68.75
22	3	6		63	90		64.8936	90.4255		22	6	7	4	11	7	18	2		2	6	1	4	1	9	0		71.4286	83.3333	91.1765	65	43.75	89.2857	91.6667	97.0588	90	56.25
23	1	5		71	95		69.1489	81.9149		23	1	0	4	13	6	18	12		1	0	0	1	0	2	0		89.2857	91.6667	94.1176	35	31.25	100	100	100	90	87.5
24	4	8		78	91		71.2766	91.4894		24	7	7	4	9	4	17	4		1	1	0	0	1	2	0		89.2857	83.3333	95.5882	60	50	96.4286	91.6667	98.5294	95	81.25
25	4	7		80	76		79.7872	89.3617		25	6	9	5	5	3	16	7		4	8	4	21	4	17	4		82.1429	94.4444	94.1176	55	43.75	64.2857	86.1111	94.1176	70	50
26	3	4		87	84		73.4043	85.1064		26	2	9	1	7	2	15	2		4	6	1	7	1	18	3		57.1429	88.8889	95.5882	45	43.75	82.1429	88.8889	91.1765	6	43.75
27	7	6		79	80		86.1702	*		27	1	4	2	4	4	8	2		2	1	2	1	2	5	0		82.1429	91.6667	100	90	50	*	*	*	*	*
28	2	7		57	92		53.1915	*		28	11	4	4	10	6	12	0		4	10	4	5	0	9	0		67.8571	75	92.6471	35	62.5	*	*	*	*	*

## Sheet: TFL_EMG
ID	MeanAmp ACLd	MeanAmp ACLr	MeanAmp CON	PeakAmp ACLd	PeakAmp ACLr	PeakAmp CON
1	9.41501	13.7328	8.72039	28.5257	32.3553	36.2811
2	7.57406	14.3273	4.03465	13.7531	29.6317	16.0089
3	5.96396	10.8062	8.35187	16.6671	26.359	18.7312
4	--	--	16.9374	--	--	34.1448
5	--	--	11.4762	--	--	22.1955
6	6.05387	3.37498	15.2091	14.9634	12.5215	36.4166
7	24.6752	6.90797	10.1891	49.6996	17.3595	23.1667
8	4.33401	3.65847	3.52863	10.0387	7.30203	14.4601
9	5.26547	6.03869	3.08473	16.9106	18.4594	8.18478
10	--	--	0.713442	--	--	4.35434
11	--	--	1.16905	--	--	2.61286
12	--	--	3.67355	--	--	8.66488
13	10.9431	8.78561	7.96909	23.353	20.3039	27.4147
14	2.14877	6.90652	2.58083	5.67763	17.2753	4.69193
15	3.24263	4.922	8.17196	10.6499	17.1595	16.3163
16	3.66253	6.015	9.26118	9.03461	17.2085	19.2133
17	6.63165	5.18912	1.94636	23.5449	26.3607	4.77369
18	16.871	14.2635	2.86252	34.8587	33.7093	10.3032
19	8.45197	7.24708	12.2412	16.3108	14.5054	19.9768
20	14.1926	12.7002	15.6771	36.0746	40.1113	29.905
21	6.55426	8.36142	10.6744	18.7323	20.2287	21.9629
22	5.62425	6.75668	14.258	10.2254	15.8931	36.1182
23	17.1937	8.64782	13.1172	56.2859	16.4465	29.6769
24	13.6883	29.7369	3.10488	61.8813	65.2525	10.762
25	10.5025	9.33626	11.9126	26.5128	31.7193	21.9069
26	--	--	--	--	--	--
27	6.25826	4.86596	3.85421	18.5832	15.6788	20.5321
28	24.629	18.3095	6.22969	46.94	33.645	6.22969

## Sheet: RF_EMG
ID	MeanAmp ACLd	MeanAmp ACLr	MeanAmp CON	PeakAmp ACLd	PeakAmp ACLr	PeakAmp CON
1	8.29206	9.02341	28.0122	20.0736	15.2414	55.3955
2	4.79371	10.3533	7.88123	14.0078	28.3688	21.1049
3	9.33343	13.721	9.90262	19.2487	32.8033	24.8439
4	8.60524	6.27237	29.695	24.997	20.0558	58.5487
5	15.2889	8.87442	17.9979	40.9103	25.0081	51.2027
6	7.08621	6.77331	19.269	17.8008	22.419	46.6977
7	15.5929	8.89462	4.71233	37.1784	23.4014	14.2693
8	5.8848	9.17391	13.0289	23.6404	29.854	43.1594
9	12.4479	8.90314	2.3797	34.823	31.5936	8.08646
10	--	--	0.423125	--	--	1.85178
11	--	--	4.13443	--	--	15.9805
12	--	--	10.1409	--	--	26.8876
13	17.8725	19.7948	17.7743	30.1738	54.1094	45.0518
14	2.72216	32.0464	11.4696	9.91368	83.6196	16.2789
15	12.9965	10.4969	14.9589	28.6723	33.4174	37.0514
16	6.55344	10.3574	8.72464	12.6168	38.7744	18.9049
17	9.09207	9.62242	5.63317	21.1821	23.2099	10.3986
18	16.6849	10.6488	14.4289	37.6756	28.4114	39.62
19	17.1019	13.2212	34.6347	34.2873	36.7324	68.5596
20	30.0277	23.0601	11.5846	55.0734	50.5325	22.511
21	11.144	9.15061	48.5958	21.3973	19.1891	106.394
22	11.9006	11.0764	15.2901	23.2432	20.7485	49.6779
23	11.6539	20.9078	27.1925	39.3659	47.5355	71.0149
24	45.2305	21.1158	2.94198	115.351	38.5443	5.49406
25	22.2226	7.88232	21.4351	35.4486	20.7769	51.626
26	--	--	--	--	--	--
27	20.1459	15.4272	11.2672	36.1692	31.6955	30.0646
28	24.1823	22.2913	8.793	47.5588	49.4008	16.7368

## Sheet: VL_EMG
ID	MeanAmp ACLd	MeanAmp ACLr	MeanAmp CON	PeakAmp ACLd	PeakAmp ACLr	PeakAmp CON
1	21.6356	16.9227	21.6499	73.1213	45.1424	58.9452
2	10.4414	20.4092	12.6922	28.998	63.6218	22.6198
3	19.1259	27.7586	17.7011	61.8517	91.8884	44.8069
4	25.0333	12.0855	25.5874	80.3198	46.9833	52.5755
5	17.9641	8.36547	42.6893	65.9487	28.1885	101.45
6	8.93097	18.758	25.1529	26.8995	57.475	50.1458
7	73.1087	31.8747	19.3215	133.118	95.58	51.0252
8	16.9776	16.8923	16.809	60.9995	64.6854	37.3702
9	11.888	14.4109	18.0429	31.7757	49.7808	37.9401
10	1.40804	0.941611	--	3.66059	7.37472	--
11	3.51954	13.2136	4.21316	13.8832	23.1812	17.7696
12	--	--	4.52095	--	--	12.1836
13	51.2757	45.1499	22.2283	147.155	98.1725	53.3332
14	--	--	5.33948	--	--	21.7896
15	43.1359	31.9031	24.2483	99.9893	58.6488	63.7194
16	11.8258	20.9559	19.221	23.4883	59.535	49.2478
17	22.7382	30.7644	22.2603	49.8833	64.9718	48.9943
18	37.8459	15.8164	24.9234	69.313	46.5654	66.9778
19	29.9486	31.0153	62.63	70.0098	86.7782	115.116
20	34.7642	18.8404	50.4002	86.2666	53.1989	103.7
21	16.5709	9.79004	33.8559	43.2311	39.9487	74.2363
22	30.7144	25.3713	19.3947	63.1607	45.6962	42.3972
23	12.066	40.0093	23.015	42.6642	95.9951	59.1115
24	37.3651	32.4833	16.4075	74.3751	62.1348	25.7467
25	23.6416	35.1139	42.4901	45.7655	68.7116	86.2339
26	--	--	--	--	--	--
27	20.7429	18.6812	34.0627	53.9533	44.4791	77.6971
28	56.2076	42.1859	21.6764	104.376	94.9785	40.2583

[truncated: 7 more sheets: VM_EMG, BF_EMG, ST_EMG, Gl_EMG, GM_EMG, ADDUC_EMG, GMED_EMG]
